# Supplementary material
Source: HighWire-hosted journal article supplement (https://cmaj.ca/highwire/filestream/59596/field_highwire_adjunct_files/0/150771-res-Appendix_1.pdf)
Supplement: 150771-res-Appendix_1.pdf [file 150771-res-Appendix_1.pdf]

**Appendix 1 (as supplied by the authors): Propensity Score Model Results of Probability of Using ARBs**

| Parameter                         | Estimate | Odds Ratios | 95% CI |       | P value |
|-----------------------------------|----------|-------------|--------|-------|---------|
|                                   |          |             | Lower  | Upper |         |
| Age, per year                     | 0.00293  | 1.003       | 1      | 1.006 | 0.03    |
| Male                              | -0.2262  | 0.798       | 0.756  | 0.842 | <.0001  |
| <b>Year of Index Date</b>         |          |             |        |       |         |
| 2000                              |          | 1           |        |       |         |
| 2001                              | -0.037   | 0.964       | 0.735  | 1.264 | 0.8     |
| 2002                              | 0.3619   | 1.436       | 1.123  | 1.837 | 0.004   |
| 2003                              | 0.6167   | 1.853       | 1.458  | 2.355 | <.0001  |
| 2004                              | 0.8102   | 2.248       | 1.777  | 2.845 | <.0001  |
| 2005                              | 0.8976   | 2.454       | 1.942  | 3.101 | <.0001  |
| 2006                              | 0.9743   | 2.649       | 2.095  | 3.35  | <.0001  |
| 2007                              | 1.1676   | 3.214       | 2.54   | 4.067 | <.0001  |
| 2008                              | 1.2802   | 3.598       | 2.844  | 4.55  | <.0001  |
| 2009                              | 1.4174   | 4.127       | 3.261  | 5.221 | <.0001  |
| 2010                              | 1.6193   | 5.05        | 3.99   | 6.391 | <.0001  |
| <b>Month of Index Date</b>        |          |             |        |       |         |
| January                           |          | 1           |        |       |         |
| February                          | 0.1092   | 1.115       | 0.979  | 1.271 | 0.1     |
| March                             | 0.0958   | 1.101       | 0.968  | 1.252 | 0.1     |
| April                             | 0.1846   | 1.203       | 1.055  | 1.371 | 0.006   |
| May                               | 0.1947   | 1.215       | 1.067  | 1.384 | 0.003   |
| June                              | 0.042    | 1.043       | 0.921  | 1.181 | 0.5     |
| July                              | 0.1852   | 1.203       | 1.062  | 1.363 | 0.004   |
| August                            | 0.0959   | 1.101       | 0.972  | 1.246 | 0.1     |
| September                         | 0.0912   | 1.096       | 0.966  | 1.242 | 0.2     |
| October                           | 0.1489   | 1.161       | 1.024  | 1.315 | 0.02    |
| November                          | 0.2025   | 1.225       | 1.08   | 1.388 | 0.002   |
| December                          | 0.2266   | 1.254       | 1.108  | 1.42  | 0.0004  |
| <b>Monthly income, NT dollars</b> |          |             |        |       |         |
| Dependent                         |          | 1           |        |       |         |
| <19,100                           | -0.07    | 0.932       | 0.865  | 1.006 | 0.07    |
| 19,100–41,999                     | -0.0444  | 0.957       | 0.899  | 1.018 | 0.2     |
| ≥42,000                           | 0.1687   | 1.184       | 1.058  | 1.324 | 0.003   |

|                                                                        |          |       |       |       |        |
|------------------------------------------------------------------------|----------|-------|-------|-------|--------|
| <b>Urbanization<sup>a</sup></b>                                        |          |       |       |       |        |
| Level 1                                                                |          | 1     |       |       |        |
| Level 2                                                                | 0.00372  | 1.004 | 0.952 | 1.059 | 0.9    |
| Level 3                                                                | 0.1661   | 1.181 | 1.037 | 1.344 | 0.01   |
| Level 4 (rural area)                                                   | 0.00328  | 1.003 | 0.745 | 1.351 | 1.0    |
| <b>Outpatient Visits, in the past one year</b>                         |          |       |       |       |        |
| 0–5 visits                                                             |          | 1     |       |       |        |
| 6–10 visits                                                            | -0.1038  | 0.901 | 0.632 | 1.286 | 0.6    |
| 11–15 visits                                                           | -0.0245  | 0.976 | 0.69  | 1.38  | 0.9    |
| >15 visits                                                             | -0.0904  | 0.914 | 0.649 | 1.285 | 0.6    |
| <b>Charlson Comorbidity Index Score<sup>b</sup></b>                    |          |       |       |       |        |
| 2                                                                      |          | 1     |       |       |        |
| 3                                                                      | 0.0516   | 1.053 | 0.977 | 1.134 | 0.2    |
| 4                                                                      | 0.1251   | 1.133 | 1.042 | 1.232 | 0.003  |
| ≥ 5                                                                    | 0.2204   | 1.247 | 1.131 | 1.374 | <.0001 |
| <b>Adapted Diabetes Complications Severity Index score<sup>c</sup></b> |          |       |       |       |        |
| Duration of diabetes, months                                           | -0.00038 | 1     | 0.999 | 1     | 0.3    |
| <b>Anti-diabetic drugs</b>                                             |          |       |       |       |        |
| Acarbose inhibits enzymes                                              | 0.1439   | 1.155 | 1.054 | 1.265 | 0.002  |
| Sulfonylurea                                                           | -0.0105  | 0.99  | 0.938 | 1.044 | 0.7    |
| Insulin                                                                | -0.00478 | 0.995 | 0.887 | 1.117 | 0.9    |
| Metformin                                                              | -0.1236  | 0.884 | 0.836 | 0.934 | <.0001 |
| Thiazolidinediones                                                     | 0.4698   | 1.6   | 1.474 | 1.736 | <.0001 |
| Glinide                                                                | 0.2951   | 1.343 | 1.201 | 1.502 | <.0001 |
| Dipeptidyl peptidase-4 inhibitor                                       | 0.8184   | 2.267 | 1.82  | 2.824 | <.0001 |
| <b>Anti-hypertensive drug</b>                                          |          |       |       |       |        |
| Alpha-blocker                                                          | 0.1123   | 1.119 | 0.971 | 1.289 | 0.1    |
| Beta-blocker                                                           | -0.0304  | 0.97  | 0.905 | 1.04  | 0.4    |
| Calcium channel blocker                                                | 0.268    | 1.307 | 1.237 | 1.382 | <.0001 |
| Diuretics                                                              | -0.112   | 0.894 | 0.834 | 0.959 | 0.002  |
| Other anti-hypertensive drug                                           | -0.5127  | 0.599 | 0.485 | 0.739 | <.0001 |
| <b>Other concomitant medications</b>                                   |          |       |       |       |        |
| Aspirin                                                                | 0.025    | 1.025 | 0.957 | 1.098 | 0.5    |
| Clopidogrel                                                            | 0.4613   | 1.586 | 1.144 | 2.199 | 0.006  |
| Ticlopidine                                                            | 0.3584   | 1.431 | 0.917 | 2.232 | 0.1    |

|                                    |         |       |       |       |        |
|------------------------------------|---------|-------|-------|-------|--------|
| <b>Warfarin</b>                    | 0.1861  | 1.205 | 0.802 | 1.809 | 0.4    |
| <b>Dipyridamole</b>                | -0.0554 | 0.946 | 0.842 | 1.064 | 0.4    |
| <b>Nitrate</b>                     | -0.0038 | 0.996 | 0.873 | 1.137 | 1.0    |
| <b>Statin</b>                      | 0.1767  | 1.193 | 1.12  | 1.272 | <.0001 |
| <b>PPI</b>                         | 0.0966  | 1.101 | 0.905 | 1.34  | 0.3    |
| <b>NSAID</b>                       | -0.2007 | 0.818 | 0.762 | 0.878 | <.0001 |
| <b>Comorbidities</b>               |         |       |       |       |        |
| <b>Hypertension</b>                | 0.2415  | 1.273 | 1.15  | 1.409 | <.0001 |
| <b>Coronary artery disease</b>     | 0.0595  | 1.061 | 0.996 | 1.131 | 0.07   |
| <b>Heart failure</b>               | 0.0922  | 1.097 | 0.989 | 1.216 | 0.08   |
| <b>Peripheral vascular disease</b> | -0.1435 | 0.866 | 0.768 | 0.977 | 0.02   |
| <b>Peptic ulcer disease</b>        | -0.0254 | 0.975 | 0.918 | 1.035 | 0.4    |
| <b>Liver disease</b>               | -0.0388 | 0.962 | 0.906 | 1.021 | 0.2    |
| <b>Chronic kidney disease</b>      | 0.1233  | 1.131 | 1.04  | 1.23  | 0.004  |
| <b>Atrial fibrillation</b>         | 0.1987  | 1.22  | 1     | 1.488 | 0.05   |
| <b>Dyslipidemia</b>                | -0.0311 | 0.969 | 0.915 | 1.027 | 0.3    |
| <b>Valvular heart disease</b>      | 0.1532  | 1.166 | 1.045 | 1.299 | 0.006  |
| <b>Cancer</b>                      | 0.0337  | 1.034 | 0.935 | 1.144 | 0.5    |
| <b>Autoimmune disease</b>          | 0.0631  | 1.065 | 0.925 | 1.226 | 0.4    |
| <b>Physical limitation</b>         | -0.0688 | 0.934 | 0.825 | 1.056 | 0.3    |

<sup>a</sup>Urbanization levels in Taiwan are divided into four strata according to the Taiwan National Health Research Institute publications. Level 1 designates the most urbanized areas, and level 4 designates the least urbanized areas.

<sup>b</sup>Charlson Comorbidity Index score is used to determine overall systemic health. With each increased level of CCI score, there are stepwise increases in the cumulative mortality.

<sup>c</sup>Adapted Diabetes Complications Severity Index is a 13-point scale from 7 complication categories: retinopathy, nephropathy, neuropathy, cerebrovascular, cardiovascular, peripheral vascular disease, and metabolic, ranging from each complication. Each complication produced a numeric score ranging from 0 to 2 (0 = no abnormality, 1 = some abnormality, 2 = severe abnormality)

*Abbreviations:* NT dollars, new Taiwan dollars; NSAID, Non-steroidal anti-inflammatory drugs; PPI, proton pump inhibitors.
